# Supplementary material for: Sox2 promotes tamoxifen resistance in breast cancer cells
Source: PubMed Central journal article supplement (PMC3936493; doi:10.1002/emmm.201303411), 2013-10-31
Supplement: emmm0006-0066-sd2.pdf [file emmm0006-0066-sd2.pdf]

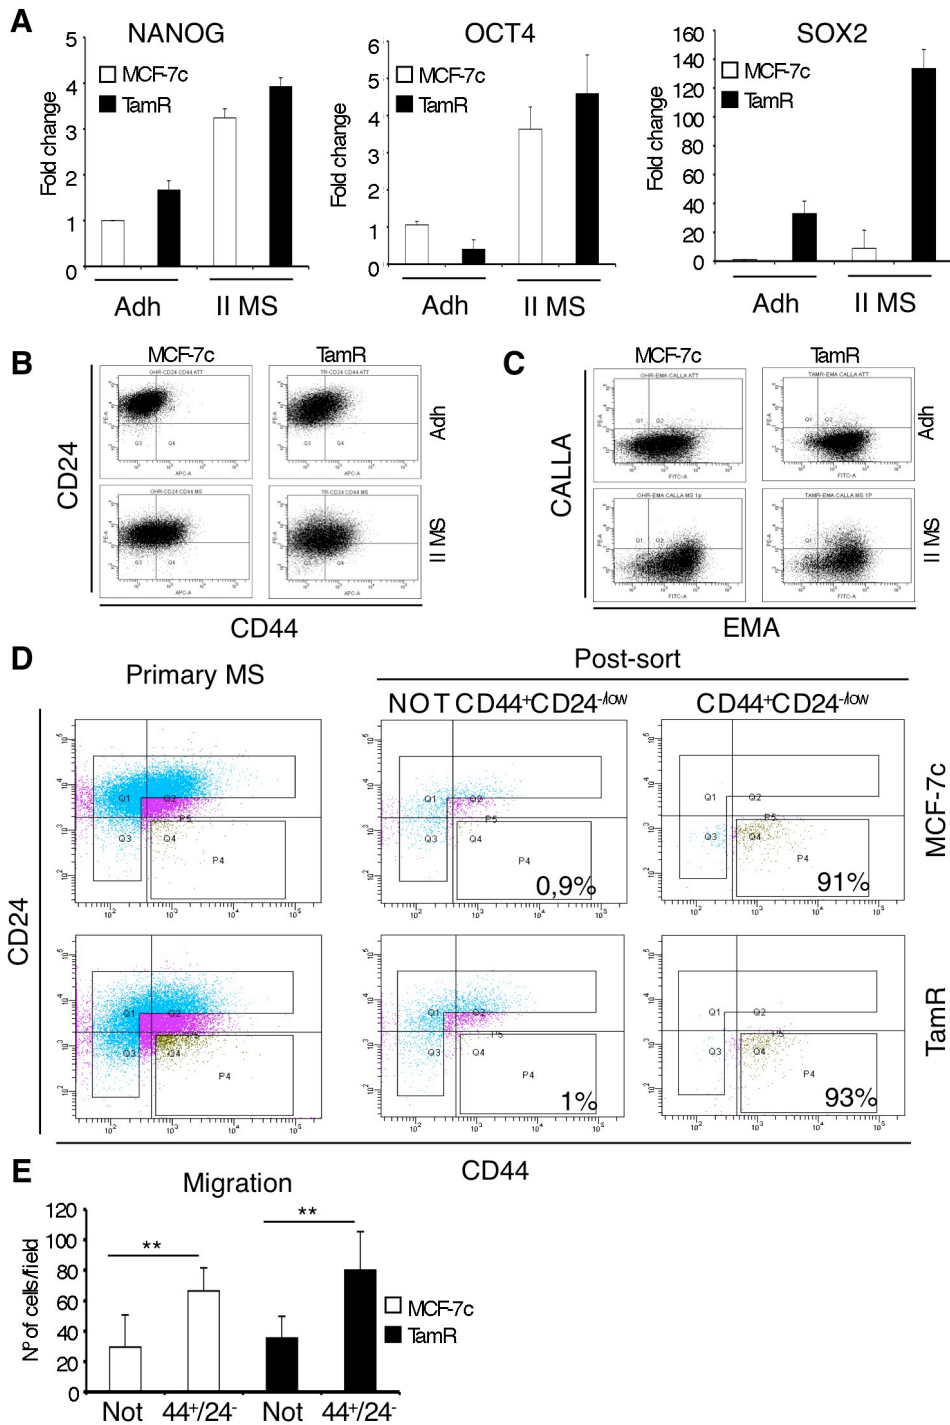

**Sup. Figure 1. Characterisation of MCF-7TamR cells.**

**A.** Transcript levels of NANOG, OCT4 and SOX2 in MCF-7c and MCF-7TamR (TamR) cells grown as adherent cells (Adh) or as secondary mammospheres (II MS) were quantified by real-time PCR and presented as fold induction with MCF-7c value set as 1 ( $n = 3$ ). **B-C.** Plots of one representative experiment of flow cytometry analysis of the **B.** CD44<sup>+</sup>/CD24<sup>-/low</sup> and **C.** EMA<sup>+</sup>/CALLA<sup>+</sup> stem cell populations in MCF-7c and MCF-7TamR cells grown as adherent cells (Adh) or as secondary mammospheres (II MS). **D.** Representative example of flow cytometry analysis of the CD44<sup>+</sup>/CD24<sup>-/low</sup> stem cell populations in MCF-7c and MCF-7TamR cells grown as primary mammospheres showing the gates to separate the CD44<sup>+</sup>/CD24<sup>-/low</sup> and NOT population (left) and the efficiency of the sorting (centre and right). **E.** *In vitro* migration capacity of MCF7c and MCF-7TamR secondary mammospheres FACS sorted for CD24 and CD44 ( $n = 4$ ) \*\* $p = 0.001$  by *t*-test.
