# Supplementary material for: Sox2 promotes tamoxifen resistance in breast cancer cells
Source: PubMed Central journal article supplement (PMC3936493; doi:10.1002/emmm.201303411), 2013-10-31
Supplement: emmm0006-0066-sd3.pdf [file emmm0006-0066-sd3.pdf]

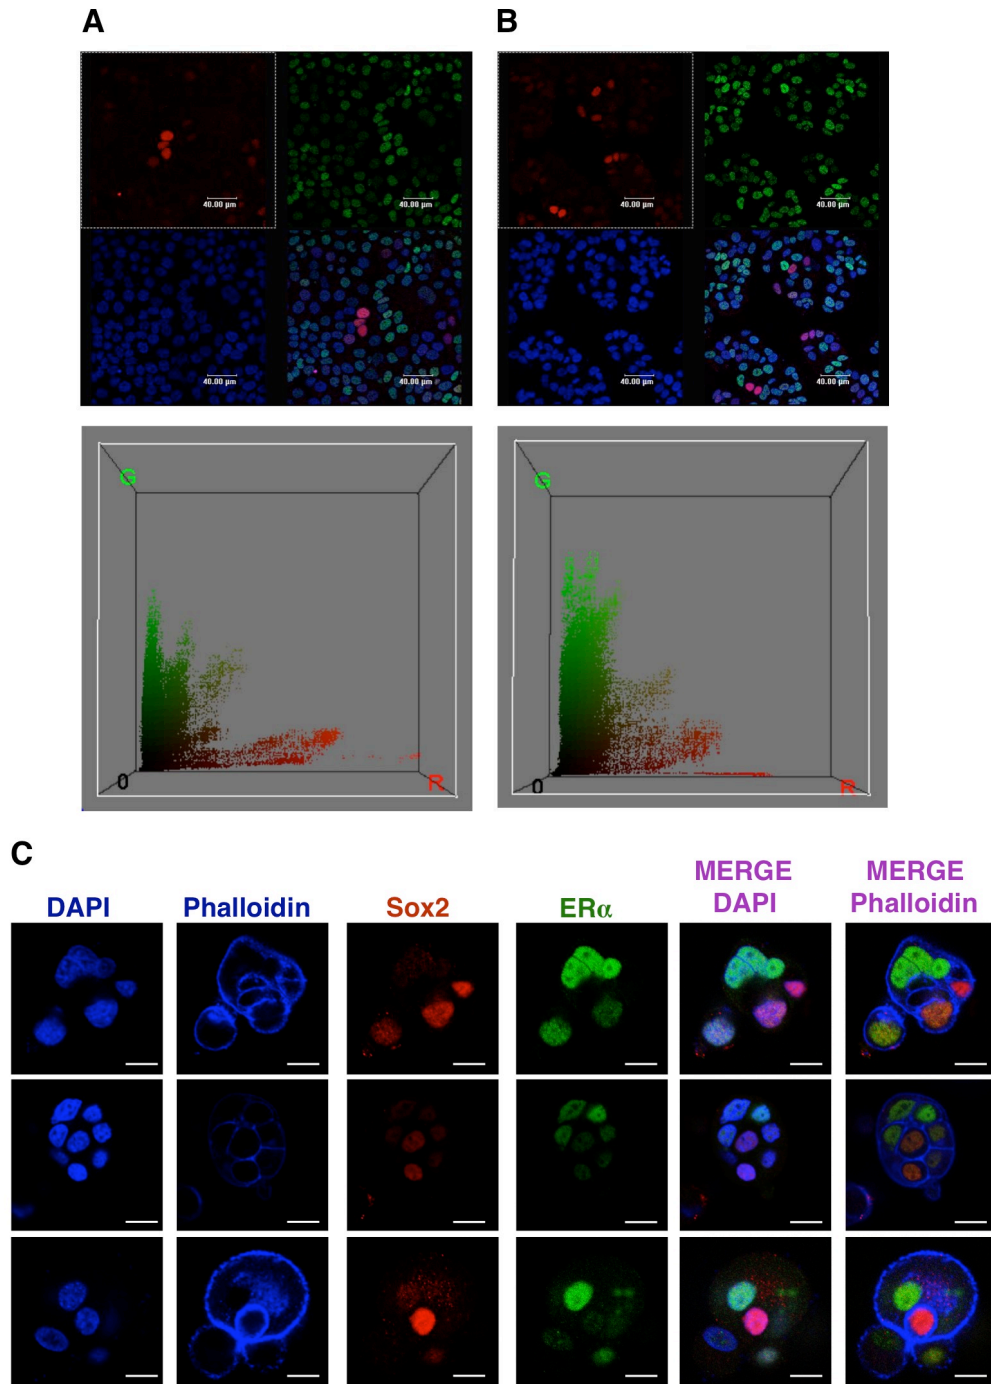

**Sup. Figure 2. Sox2 and ER expression.**

Sox2 and ER expression was visualised by immunofluorescence in **A**. T-47D and **B**. ZR-75-1 cells grown in adherent conditions (Bar = 40  $\mu$ m). **C**. Expression of Sox2 and ER was visualised by immunofluorescence in MCF-7TamR cells grown as secondary mammospheres (Bar = 10  $\mu$ m).
