# Supplementary material for: Sox2 promotes tamoxifen resistance in breast cancer cells
Source: PubMed Central journal article supplement (PMC3936493; doi:10.1002/emmm.201303411), 2013-10-31
Supplement: emmm0006-0066-sd4.pdf [file emmm0006-0066-sd4.pdf]

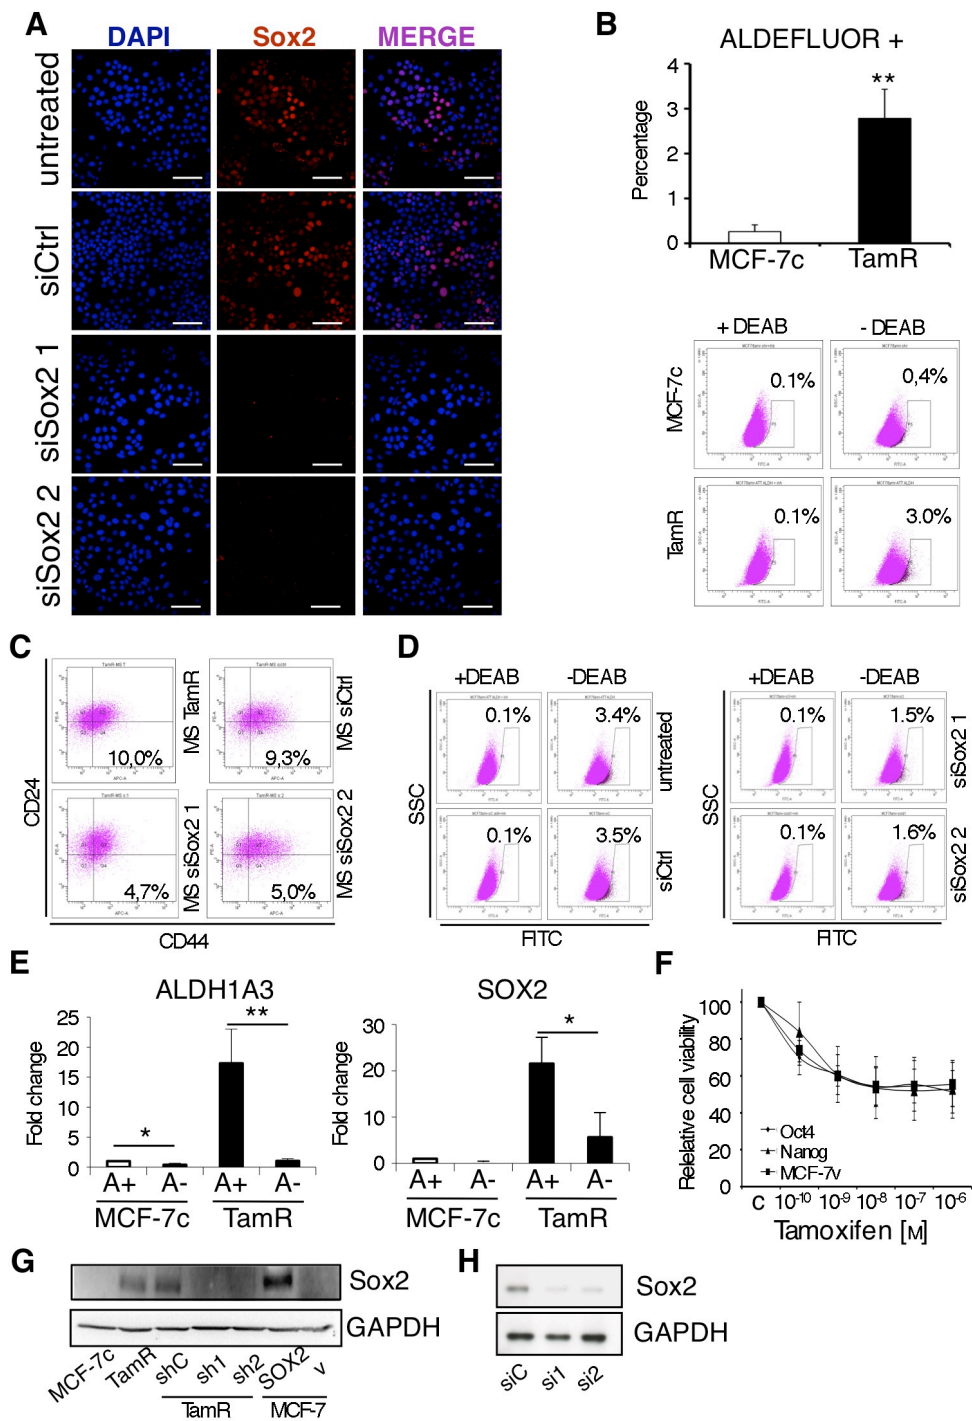

**Sup. Figure 3. Modulation of Sox2 expression levels.**

**A.** Immunofluorescence analysis of Sox2 expression levels in adherent MCF-7TamR cells transfected with 2 different Sox2 siRNA sequences (siSox2 1 and 2) as well as a control siRNA sequence (siCtrl) (Bar = 50  $\mu$ m). **B.** ALDEFLUOR positive population in adherent MCF-7c and MCF-7TamR cells ( $n = 3$ )  $**p = 0.002$  by *t*-test. One representative FACS analysis is shown. **C.** Representative example of flow cytometry analysis of the CD44<sup>+</sup>/CD24<sup>-low</sup> stem cell populations in MCF-7TamR cells transfected with 2 different Sox2 siRNA sequences (siSox2 1 and 2) as well as a control siRNA sequence (siCtrl) grown as mammospheres. **D.** Representative example of flow cytometry analysis of ALDEFLUOR population in MCF-7TamR cells transfected with 2 different Sox2 siRNA sequences (siSox2 1 and 2) as well as a control siRNA sequence (siCtrl). **E.** ALDH1A3 ( $**p = 0.002$  by *t*-test) and SOX2 ( $*p = 0.04$  by *t*-test) mRNA expression levels in ALDEFLUOR positive (A+) and negative (A-) population of MCF-7c and MCF-7TamR (TamR) cells quantified by real-time PCR ( $n = 4$ ). **F.** Proliferation analysis of control MCF-7v (v) cells and MCF-7 cells overexpressing Nanog (Nanog) and Oct4 (Oct4) growing in presence of tamoxifen by crystal violet ( $n = 4$ ). **G.** Western blot analysis of Sox2 and GAPDH (loading control) expression levels in adherent MCF7c, MCF-7TamR cells, MCF-7TamR cells stably transfected with 2 different Sox2 shRNA sequences (sh1 and sh2) as well as a control shRNA sequence (shC) and MCF-7 cells stably overexpressing Sox2 (Sox2) and control MCF-7v cells (v). **H.** Western blot analysis of Sox2 levels and GAPDH (loading control) in BT474 cells transfected with two specific Sox2 siRNA sequences (si1, si2, as in A) and control siRNA sequence (siC).
