# Supplementary material for: Sox2 promotes tamoxifen resistance in breast cancer cells
Source: PubMed Central journal article supplement (PMC3936493; doi:10.1002/emmm.201303411), 2013-10-31
Supplement: emmm0006-0066-sd9.pdf [file emmm0006-0066-sd9.pdf]

**Table1:** Correlations between Sox2 expression and clinicopathological and immunohistochemical features in breast carcinomas.

|               | Sox2<br>negative<br><i>n</i> = 33 | Sox2<br>positive<br><i>n</i> = 48 | p value<br>( $\chi^2$ ) |
|---------------|-----------------------------------|-----------------------------------|-------------------------|
| Size          |                                   |                                   | 0.52                    |
| T1            | 14/33                             | 12/30                             |                         |
| T2            | 17/33                             | 18/30                             |                         |
| Histol. Grade |                                   |                                   | 0.006                   |
| G1            | 4/33                              | 4/48                              |                         |
| G2            | 25/33                             | 26/48                             |                         |
| G3            | 2/33                              | 18/48                             |                         |
| Age           |                                   |                                   | 0.64                    |
| <50           | 10/33                             | 8/48                              |                         |
| >50           | 23/33                             | 32/48                             |                         |
| <i>HER2</i>   |                                   |                                   | 0.19                    |
| Positive      | 5/33                              | 8/44                              |                         |
| Negative      | 28/33                             | 34/44                             |                         |
| <i>P53</i>    |                                   |                                   | 0.09                    |
| Positive      | 13/33                             | 18/43                             |                         |
| Negative      | 20/33                             | 24/43                             |                         |
