# Supplementary material for: Sox2 promotes tamoxifen resistance in breast cancer cells
Source: EMBO Mol Med. 2013 Oct 31;6(1):66–79. doi: 10.1002/emmm.201303411 (PMC3936493; doi:10.1002/emmm.201303411)
Supplement: Supplementary file 7 [file emmm0006-0066-sd7.pdf]

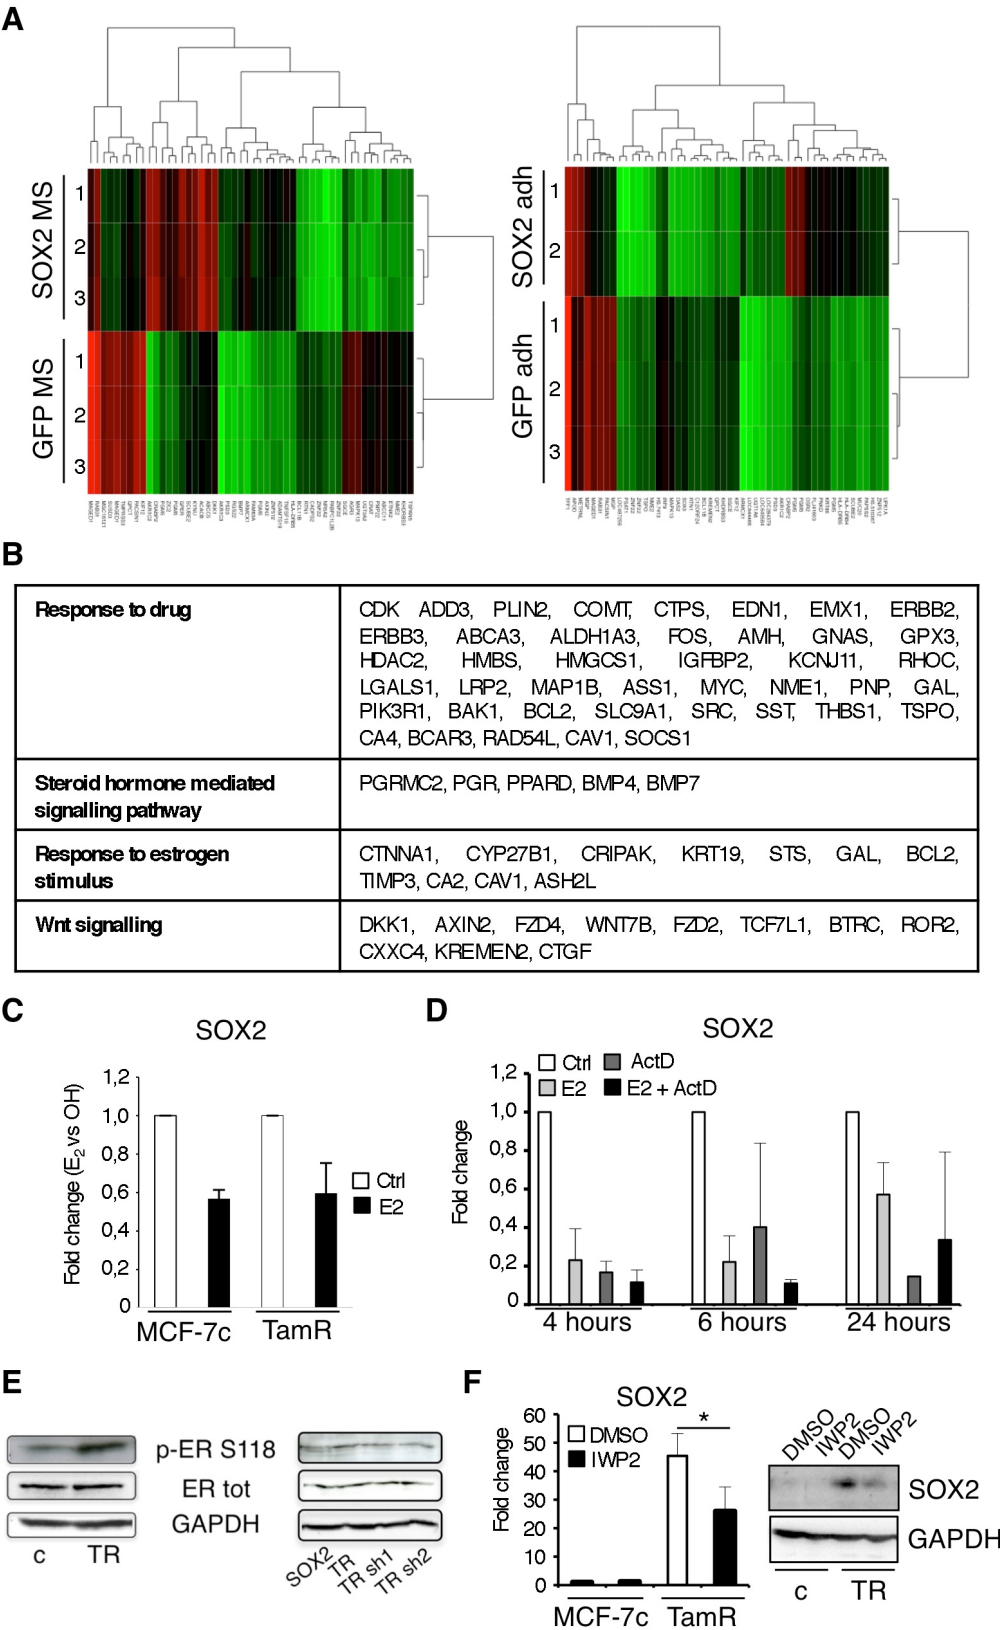

**Sup. Figure 6. Gene expression profile of Sox2 overexpressing cells.**

**A.** Heat maps of the 50 most significantly regulated genes in MCF7 cells overexpressing SOX2 versus the control cells grown as mammospheres (left) or in adherent conditions (right). **B.** Differently regulated genes in adherent MCF-7SOX2 cells involved in important pathways for breast cancer stem cells. **C.** Quantitative PCR analysis of SOX2 mRNA expression levels in control (MCF-7c) and resistant (TamR) cells treated with vehicle ethanol (Ctrl, white bars) or estrogen (10 nM, black bars) during 6 hours ( $n = 3$ ). **D.** Quantitative PCR analysis of SOX2 mRNA expression levels in MCF-7TamR cells treated with vehicle ethanol (Ctrl), actinomycin D (0,5  $\mu$ g/ml) at the indicated times, estrogen (10 nM), or both together ( $n = 3$ ). **E.** Immunoblotting of parental (MCF-7c) and tamoxifen resistant (TamR) cells for P-S118, total ER $\alpha$ , and  $\beta$ -actin as control (left) and of MCF-7 cells overexpressing Sox2 (SOX2), MCF-7TamR cells stably transfected with control shRNA sequences (shC) or two different specific shRNA sequences (sh1 and sh2) (right). **F.** Sox2 expression levels in parental MCF-7 (c) or MCF-7TamR cells (TR) treated with vehicle (DMSO) or the Wnt inhibitor IWP2 (2  $\mu$ M) during a period of 2 days determined by Western blot (Top) or qPCR analysis (Bottom) ( $n = 3$ ) \* $p = 0.04$  by  $t$ -test.
